# Supplementary material
Source: publisher figshare collection journal article supplement (https://acs.figshare.com/ndownloader/files/12988049)
Supplement: Supplementary file 1 [file 12988049]

Supporting Information for

**Transparent Polyelectrolyte Complex Thin Film with Ultralow Oxygen Transmission Rate**

*Ryan J. Smith<sup>a</sup>, Carolyn T. Long<sup>b</sup>, Jaime C. Grunlan<sup>a,b,c\*</sup>*

<sup>a</sup>**Department of Chemistry, Texas A&M University, 3123 TAMU, College Station, Texas, USA 77843**

<sup>b</sup>**Department of Mechanical Engineering, Texas A&M University, 3123 TAMU, College Station, Texas, USA 77843**

<sup>c</sup>**Department of Materials Science and Engineering, Texas A&M University, 3003 TAMU, College Station, Texas, USA 77843**

**\*Corresponding author. Email: [jgrunlan@tamu.edu](mailto:jgrunlan@tamu.edu)**

**Table S1.** Percent difference in PEC film thickness, mass, and estimated density after curing.

| Property  | 25 mM CA [%]   | 25 mM CA + NaCl [%] | 200 mM CA [%] | 200 mM CA + NaCl [%] | 300 mM CA [%] |
|-----------|----------------|---------------------|---------------|----------------------|---------------|
| Thickness | -16.02 ± 4.76  | -16.01 ± 2.12       | -17.65 ± 3.65 | -15.42 ± 4.62        | -14.22 ± 1.90 |
| Mass      | -43.70 ± 10.42 | -9.05 ± 1.49        | -2.92 ± 5.23  | 6.21 ± 7.88          | 7.04 ± 2.75   |
| Density   | -32.96 ± 5.13  | 8.29 ± 0.62         | 19.89 ± 1.50  | 25.57 ± 3.02         | 24.79 ± 0.83  |
